# Supplementary material for: Endocrine Secretory Reserve and Proinsulin Processing in Recipients of Islet of Langerhans Versus Whole Pancreas Transplants
Source: PubMed Central journal article supplement — Diabetes Care. 2013 Oct 15;36(11):3726–31. doi: 10.2337/dc12-2710 (PMC3816861; doi:10.2337/dc12-2710), 2013-10-15
Supplement: supp_dc12-2710v122710_DC122710SupplementaryData.pdf [file supp_dc12-2710v122710_DC122710SupplementaryData.pdf]

SUPPLEMENTARY DATA

**Supplementary Table 1.** Acute Responses (AR) to arginine stimulation and area under the curve (AUC) for insulin and c-peptide in islet groups, pancreas group, and control group (values are shown as mean ± standard deviation).

|                                   | <b>Healthy Controls</b><br>(n = 10) | <b>Islet Recipients</b>      |                                | <b>Pancreas Recipients</b><br>(n = 32) |
|-----------------------------------|-------------------------------------|------------------------------|--------------------------------|----------------------------------------|
|                                   |                                     | Insulin Requiring<br>(n = 6) | Insulin Independent<br>(n = 9) |                                        |
| <i>Insulin AR (pmol/L)</i>        | 217 ± 163                           | 23 ± 13 <sup>†</sup>         | 125 ± 90 <sup>*</sup>          | 266 ± 129                              |
| <i>C-Peptide AR (pmol/L)</i>      | 717 ± 362                           | 91 ± 53 <sup>†</sup>         | 278 ± 124 <sup>‡</sup>         | 550 ± 244                              |
| <i>Insulin AUC (pmol·min/L)</i>   | 1332 ± 959                          | 152 ± 91 <sup>†</sup>        | 774 ± 528 <sup>*</sup>         | 1540 ± 707                             |
| <i>C-peptide AUC (pmol·min/L)</i> | 4955 ± 3158                         | 630 ± 428 <sup>†</sup>       | 1843 ± 875 <sup>‡</sup>        | 3859 ± 2061                            |

p < 0.01 versus insulin requiring islet recipients, p < 0.005 versus pancreas recipients

<sup>†</sup> p < 0.01 versus insulin independent islet recipients, p < 0.0005 versus pancreas recipients, p < 0.005 versus control subjects

<sup>‡</sup> p < 0.005 versus insulin requiring islet recipients, p < 0.0005 versus pancreas recipients, p < 0.05 versus control subjects

No statistically significant difference between pancreas recipients and control subjects
